# Supplementary material for: The influence of the diphenylphosphoryl moiety on the phosphorescent properties of heteroleptic iridium(iii) complexes and the OLED performance: a theoretical study
Source: Royal Society of Chemistry journal article supplement (doi:10.1039/c3tc31831a), 2014-01-01
Supplement: c3tc31831a.pdf [file c3tc31831a.pdf]

# The influence of diphenylphosphoryl on the phosphorescent properties of heteroleptic Iridium (III) complexes and OLED performance: a theoretical study

Li Wang,<sup>a</sup> Yong Wu,<sup>a</sup> Guo-Gang Shan,<sup>a</sup> Yun Geng,<sup>a</sup> Jian-Zhao Zhang,<sup>a</sup> Dong-Mei Wang,<sup>b</sup> Guo-Chun Yang<sup>a</sup> and Zhong-Min Su<sup>\*a</sup>

<sup>a</sup> Institute of Functional Material Chemistry, Faculty of Chemistry, Northeast Normal University, Changchun 130024, China

<sup>b</sup> Department of Chemistry, Baoji College of arts. & sci., Baoji, 721013, China

**Table S1.** the HOMO and energy gap between HOMO and LUMO of complex **FIrpicPO** at optimized S<sub>0</sub> geometry.

|         | TPSSh | PBE1PBE | B3LYP | Exp   |
|---------|-------|---------|-------|-------|
| HOMO/eV | -5.24 | -5.87   | -5.61 | -5.47 |
| Eg/eV   | 3.09  | 4.08    | 3.71  | 2.48  |

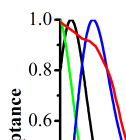

**Fig. S1** The simulated absorption spectra of **FIrpicPO** calculated at B3LYP/PBE0/TPSSh functional in CH<sub>2</sub>Cl<sub>2</sub> solution together with the experimental absorption spectra.

**Table S2.** Molecular orbital composition (%) of **FIrpic** at optimized T<sub>1</sub> geometry.

| Orbital | Ir-d  | dfppy1 | dfppy2 | pic   |
|---------|-------|--------|--------|-------|
| LUMO+2  | 3.31  | 87.03  | 4.30   | 4.40  |
| LUMO+1  | 1.32  | 3.61   | 0.96   | 93.54 |
| LUMO    | 3.35  | 4.87   | 88.95  | 1.48  |
| HOMO    | 36.97 | 22.67  | 33.67  | 5.82  |
| HOMO-1  | 33.54 | 27.54  | 29.60  | 9.20  |
| HOMO-2  | 36.03 | 12.36  | 39.99  | 10.85 |

**Table S3.** Molecular orbital composition (%) of **FIrpicPO** at optimized T<sub>1</sub> geometry.

| Orbital | Ir-d  | Ph <sub>2</sub> PO1 | Ph <sub>2</sub> PO2 | dfppy1 | dfppy2 | Pic   |
|---------|-------|---------------------|---------------------|--------|--------|-------|
| LUMO+2  | 1.48  | 0.63                | 0.02                | 6.21   | 0.37   | 90.84 |
| LUMO+1  | 2.42  | 4.77                | 0.24                | 87.12  | 3.00   | 1.62  |
| LUMO    | 3.15  | 0.11                | 5.86                | 3.28   | 85.70  | 0.95  |
| HOMO    | 37.80 | 0.20                | 0.50                | 23.86  | 30.14  | 6.57  |

|        |       |      |      |       |       |       |
|--------|-------|------|------|-------|-------|-------|
| HOMO-1 | 43.30 | 1.27 | 0.85 | 27.21 | 12.69 | 14.45 |
| HOMO-2 | 25.96 | 0.09 | 2.70 | 8.37  | 55.51 | 6.74  |

**Table S4.** Molecular orbital composition (%) of **IrpcPO** at optimized T<sub>1</sub> geometry.

| Orbital | Ir-d  | Ph <sub>2</sub> PO1 | Ph <sub>2</sub> PO2 | ppy1  | ppy2  | pic   |
|---------|-------|---------------------|---------------------|-------|-------|-------|
| LUMO+2  | 1.41  | 0.01                | 0.03                | 0.57  | 0.83  | 96.60 |
| LUMO+1  | 2.82  | 0.49                | 4.82                | 7.62  | 82.20 | 1.45  |
| LUMO    | 2.76  | 4.64                | 0.46                | 81.62 | 8.15  | 0.98  |
| HOMO    | 38.10 | 0.44                | 0.35                | 33.93 | 20.30 | 5.97  |
| HOMO-1  | 53.54 | 0.65                | 1.08                | 19.53 | 8.71  | 15.94 |
| HOMO-2  | 25.63 | 2.13                | 2.18                | 27.02 | 37.66 | 4.87  |
